# Supplementary material for: Weakly bound PTCDI and PTCDA dimers studied by using MP2 and DFT methods with dispersion correction
Source: Royal Society of Chemistry journal article supplement (doi:10.1039/c3cp44644a), 2013-01-01
Supplement: c3cp44644a.pdf [file c3cp44644a.pdf]

## Weakly bound PTCDI and PTCDA dimers studied by using MP2 and DFT methods with dispersion correction

Mircea Oltean, George Mile, Mihai Vidrighin, Nicolae Leopold, Vasile Chiș<sup>a</sup>

*Babeș-Bolyai University, Faculty of Physics, Kogălniceanu 1, RO-400084, Cluj-Napoca, Romania*

### Supporting information

|                              |                                                                                                                                                                                     |        |
|------------------------------|-------------------------------------------------------------------------------------------------------------------------------------------------------------------------------------|--------|
| Complete Gaussian09 citation |                                                                                                                                                                                     | S1     |
| Figures S1-S6                | Calculated potential energy curves for the stacked PTCDI and PTCDA dimers at different levels of theory, fitted to modified-Morse, Lennard-Jones and Buckingham potential functions | S3-S8  |
| Tables S1-S4                 | Binding energies, equilibrium distances and fitting parameters for PTCDI and PTCDA dimers with Murrell-Sorbie, modified-Morse, Lennard-Jones and Buckingham potential functions     | S9-S12 |
|                              | Impact of the dispersion correction scheme on the APEFs parameters                                                                                                                  | S13    |
|                              | Dispersion energies for PTCDI and PTCDA                                                                                                                                             | S14    |

---

<sup>a</sup> To whom correspondence should be addressed. E-mail: vasile.chis@phys.ubbcluj.ro

### Complete Gaussian09 citation

Frisch, M. J.; Trucks, G. W.; Schlegel, H. B.; Scuseria, G. E.; Robb, M. A.; Cheeseman, J. R.; Scalmani, G.; Barone, V.; Mennucci, B.; Petersson, G. A.; Nakatsuji, H.; Caricato, M.; Li, X.; Hratchian, H. P.; Izmaylov, A. F.; Bloino, J.; Zheng, G.; Sonnenberg, J. L.; Hada, M.; Ehara, M.; Toyota, K.; Fukuda, R.; Hasegawa, J.; Ishida, M.; Nakajima, T.; Honda, Y.; Kitao, O.; Nakai, H.; Vreven, T.; J. A. Montgomery, J.; Peralta, J. E.; Ogliaro, F.; Bearpark, M.; Heyd, J.J.; Brothers, E.; Kudin, K. N.; Staroverov, V. N.; Kobayashi, R.; Normand, J.; Raghavachari, K.; Rendell, A.; Burant, J. C.; Iyengar, S. S.; Tomasi, J.; Cossi, M.; Rega, N.; Millam, J. M.; Klene, M.; Knox, J. E.; Cross, J. B.; Bakken, V.; Adamo, C.; Jaramillo, J.; Gomperts, R.; Stratmann, R. E.; Yazyev, O.; Austin, A. J.; Cammi, R.; Pomelli, C.; Ochterski, J. W.; Martin, R. L.; Morokuma, K.; Zakrzewski, V. G.; Voth, G. A.; Salvador, P.; Dannenberg, J. J.; Dapprich, S.; Daniels, A. D.; Farkas, Ö.; Foresman, J. B.; Ortiz, J. V.; Cioslowski, J.; Fox, D. J. *Gaussian09*, Revision A.2; Gaussian, Inc.: Wallingford, CT, 2009.

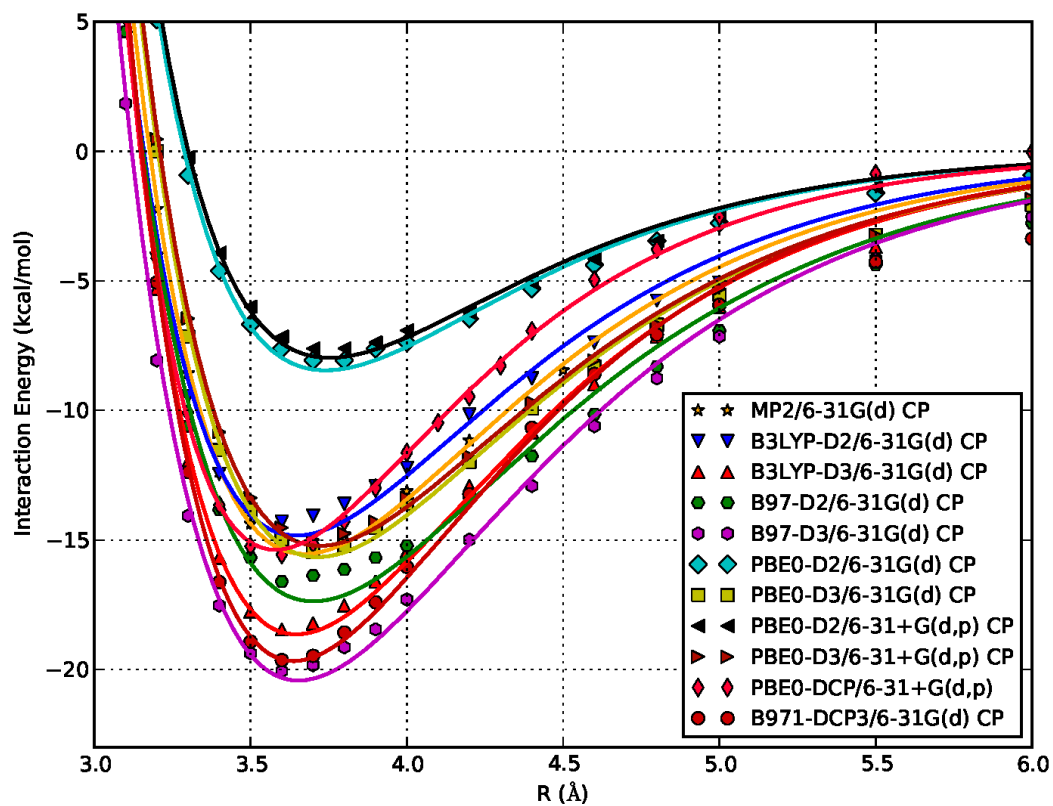

**Figure S1.** Calculated potential energy curves for the stacked PTCDI dimer at different levels of theory, fitted to a modified-Morse potential function.

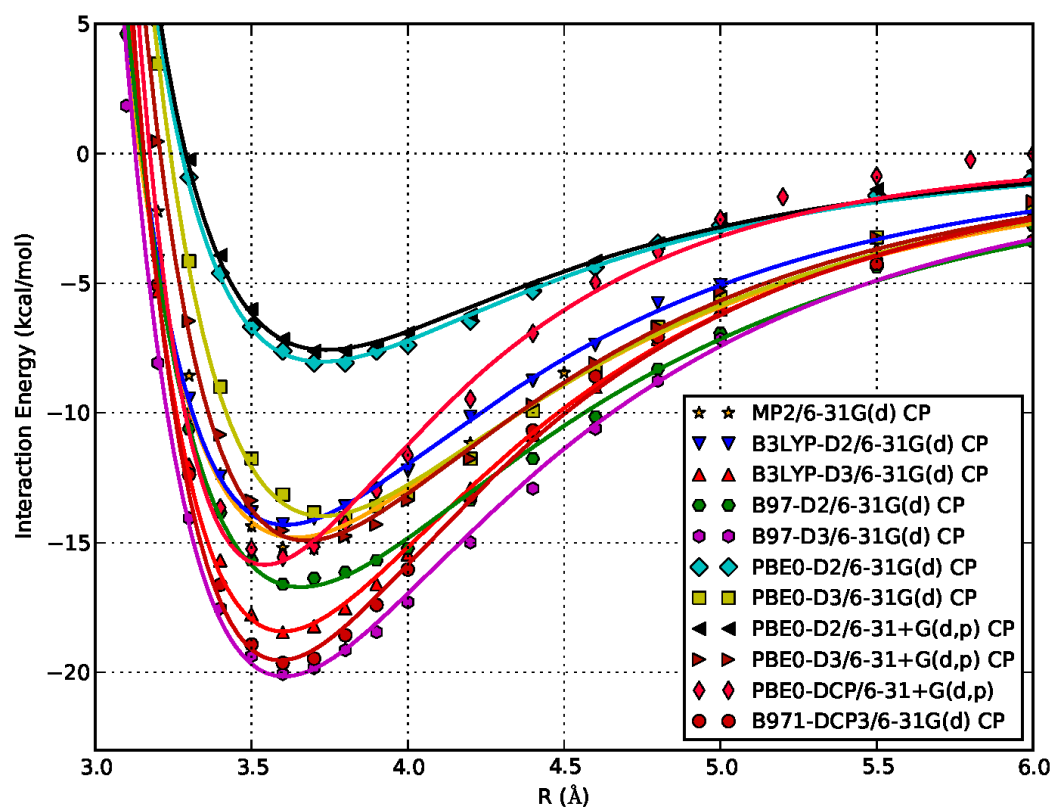

**Figure S2.** Calculated potential energy curves for the stacked PTCDI dimer at different levels of theory, fitted to a Lennard-Jones potential function.

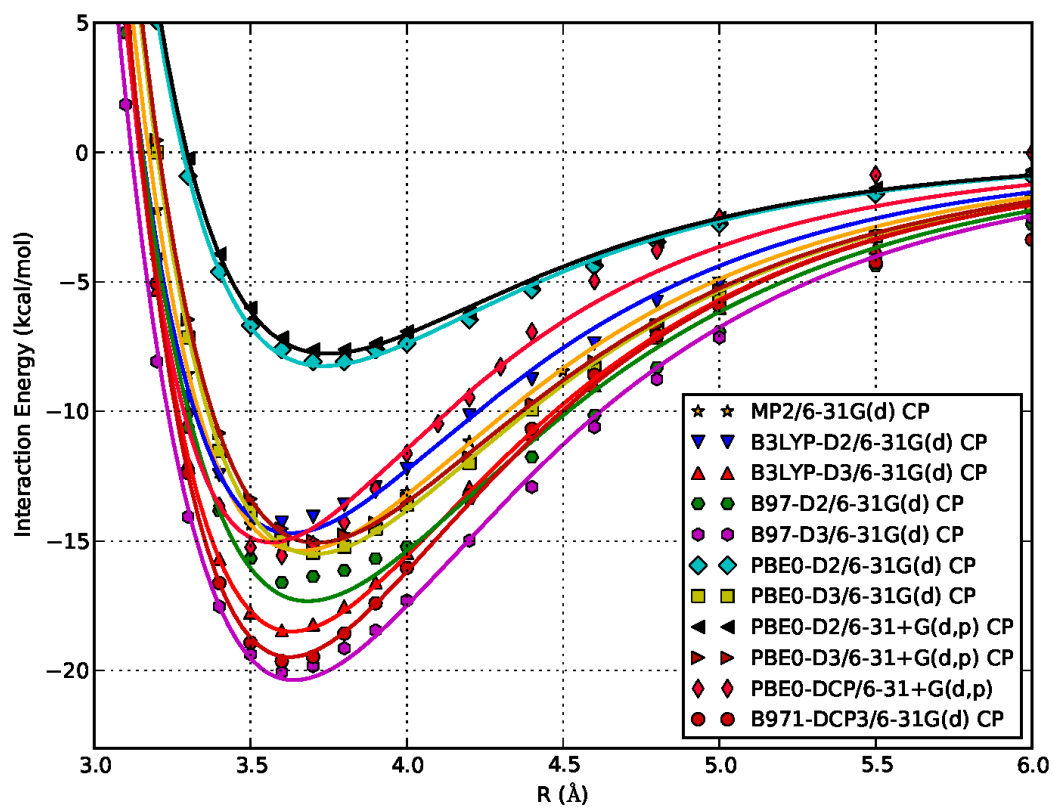

**Figure S3.** Calculated potential energy curves for the stacked PTCDI dimer at different levels of theory, fitted to a Buckingham potential function.

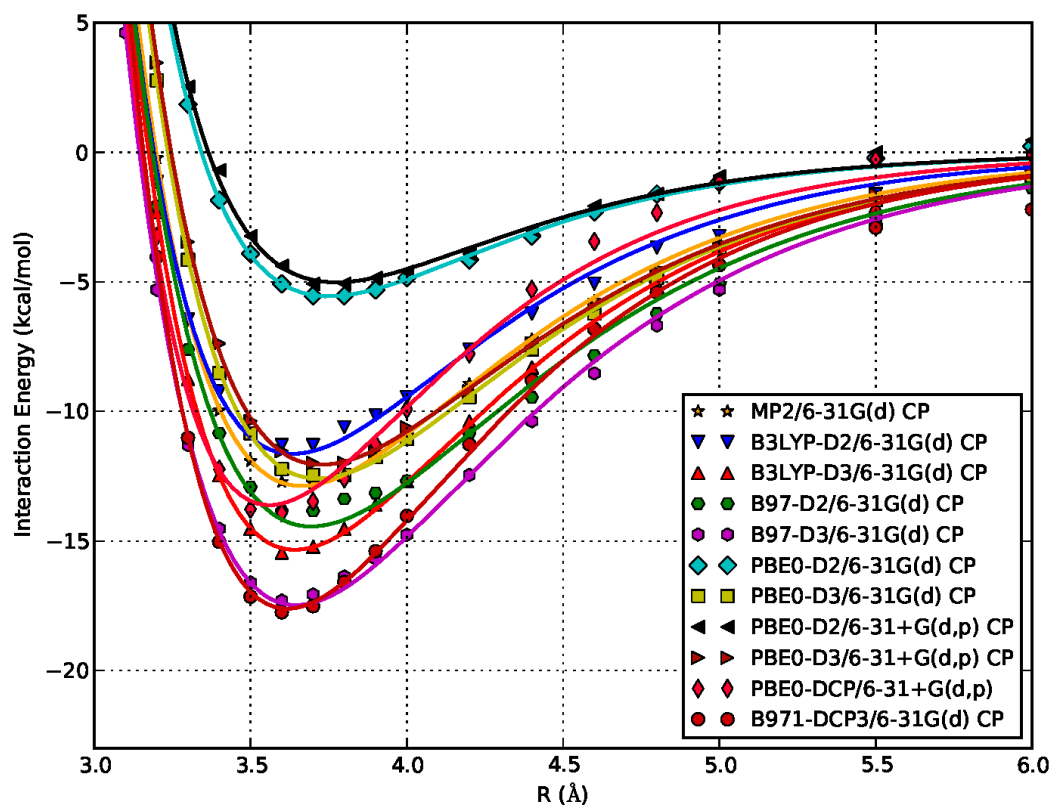

**Figure S4.** Calculated potential energy curves for the stacked PTCDA dimer at different levels of theory, fitted to a modified-Morse potential function.

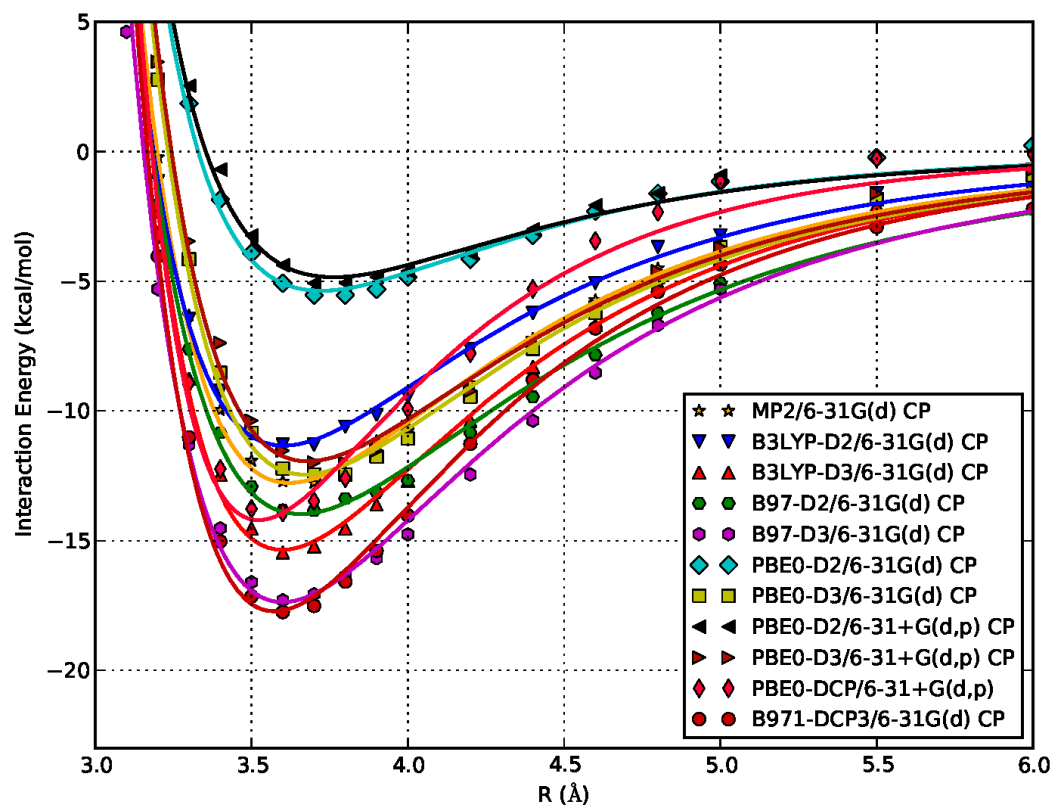

**Figure S5.** Calculated potential energy curves for the stacked PTCDA dimer at different levels of theory, fitted to a Lennard-Jones potential function.

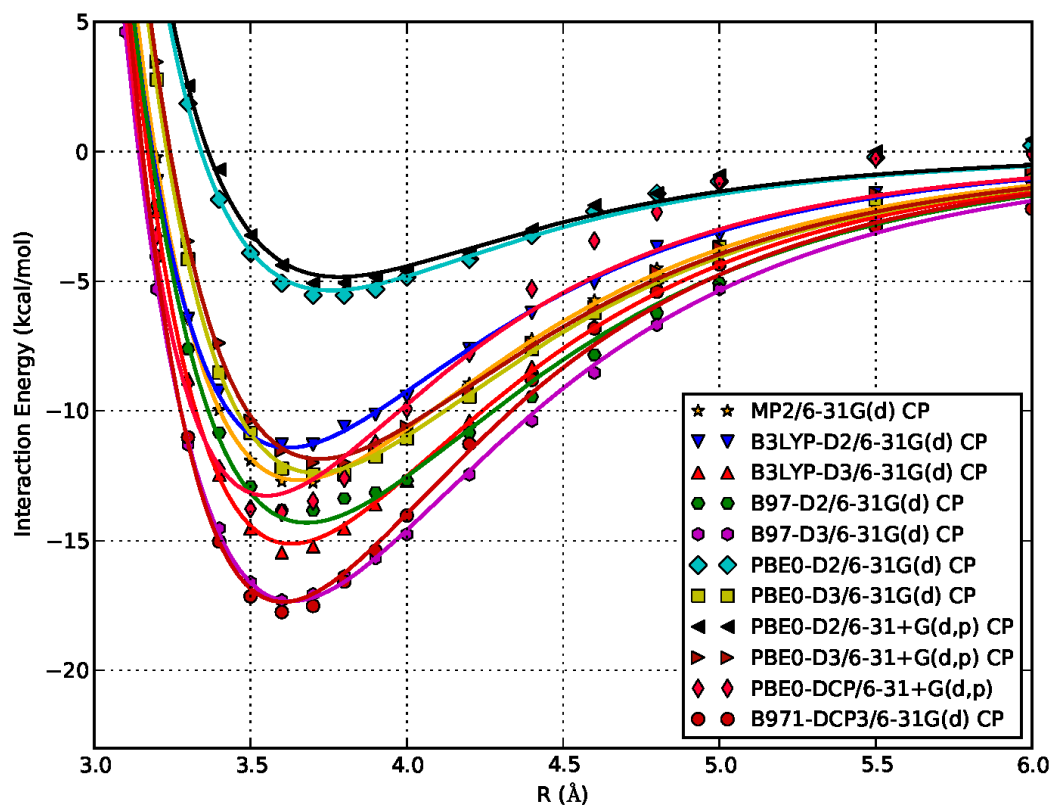

**Figure S6.** Calculated potential energy curves for the stacked PTCDA dimer at different levels of theory, fitted to a Buckingham potential function.



**Table S1.** Binding energies, equilibrium distances and fitting parameters for PTCDI and PTCDA dimers with the Murrel-Sorbie potential function

| PTCDI |              |             |                              |                    |                |                |                |                | PTCDA                        |                    |                |                |                |                |
|-------|--------------|-------------|------------------------------|--------------------|----------------|----------------|----------------|----------------|------------------------------|--------------------|----------------|----------------|----------------|----------------|
| No.   | Method       | Basis set   | D <sub>e</sub><br>(kcal/mol) | R <sub>e</sub> (Å) | a <sub>1</sub> | a <sub>2</sub> | a <sub>3</sub> | R <sup>2</sup> | D <sub>e</sub><br>(kcal/mol) | R <sub>e</sub> (Å) | a <sub>1</sub> | a <sub>2</sub> | a <sub>3</sub> | R <sup>2</sup> |
| 1     | MP2 CP       | 6-31G(d)    | -16.12                       | 3.708              | 3.211          | 2.992          | 1.005          | 0.9818         | -12.80                       | 3.659              | 2.040          | -0.135         | 0.284          | 1.0000         |
| 2     | B3LYP-D2 CP  | 6-31G(d)    | -14.37                       | 3.610              | 2.002          | -0.027         | 0.749          | 0.9998         | -11.32                       | 3.625              | 2.387          | 0.571          | 0.696          | 0.9998         |
| 3     | B3LYP-D3 CP  | 6-31G(d)    | -18.43                       | 3.626              | 1.770          | -0.436         | 0.418          | 1.0000         | -15.29                       | 3.637              | 1.998          | -0.216         | 0.251          | 0.9999         |
| 4     | B97-D2 CP    | 6-31G(d)    | -16.56                       | 3.665              | 2.147          | 0.909          | 0.882          | 0.9997         | -13.86                       | 3.686              | 2.363          | 1.238          | 0.864          | 0.9998         |
| 5     | B97-D3 CP    | 6-31G(d)    | -20.02                       | 3.629              | 2.039          | 0.437          | 0.498          | 0.9999         | -17.20                       | 3.639              | 2.332          | 0.927          | 0.534          | 0.9998         |
| 6     | PBE0-D2 CP   | 6-31G(d)    | -8.09                        | 3.738              | 2.232          | 0.416          | 0.698          | 0.9999         | -5.60                        | 3.761              | 3.068          | 1.879          | 0.678          | 0.9998         |
| 7     | PBE0-D3 CP   | 6-31G(d)    | -15.40                       | 3.699              | 1.831          | -0.158         | 0.351          | 0.9999         | -12.55                       | 3.715              | 2.128          | 0.208          | 0.229          | 1.0000         |
| 8     | PBE0-D2 CP   | 6-31+G(d,p) | -7.63                        | 3.762              | 2.393          | 0.881          | 0.726          | 1.0000         | -5.12                        | 3.797              | 3.425          | 3.057          | 1.228          | 0.9996         |
| 9     | PBE0-D3 CP   | 6-31+G(d,p) | -14.97                       | 3.709              | 1.898          | -0.002         | 0.341          | 1.0000         | -12.01                       | 3.733              | 2.430          | 0.956          | 0.365          | 0.9999         |
| 10    | PBE0-DCP     | 6-31+G(d,p) | -15.61                       | 3.592              | 2.060          | -0.499         | 0.224          | 0.9998         | -14.00                       | 3.585              | 3.650          | 3.717          | 1.560          | 0.9998         |
| 11    | B971-DCP3 CP | 6-31G(d)    | -19.69                       | 3.620              | 1.460          | -1.180         | 0.571          | 1.0000         | -17.78                       | 3.611              | 1.491          | -1.350         | 0.552          | 1.0000         |

**Table S2.** Binding energies, equilibrium distances and fitting parameters for PTCDI and PTCDA dimers with the modified-Morse potential function

| PTCDI |              |             |                  |           |       |        | PTCDA            |           |        |        |
|-------|--------------|-------------|------------------|-----------|-------|--------|------------------|-----------|--------|--------|
| No.   | Method       | Basis set   | $D_e$ (kcal/mol) | $R_e$ (Å) | a     | $R^2$  | $D_e$ (kcal/mol) | $R_e$ (Å) | a      | $R^2$  |
| 1     | MP2 CP       | 6-31G(d)    | -14.74           | 3.647     | 1.400 | 0.9704 | -12.75           | 3.664     | 1.487  | 0.9998 |
| 2     | B3LYP-D2 CP  | 6-31G(d)    | -14.83           | 3.647     | 1.418 | 0.9930 | -10.19           | 3.673     | 1.559  | 0.9990 |
| 3     | B3LYP-D3 CP  | 6-31G(d)    | -18.63           | 3.647     | 1.388 | 0.9977 | -15.34           | 3.642     | 1.481  | 0.9998 |
| 4     | B97-D2 CP    | 6-31G(d)    | -17.36           | 3.702     | 1.268 | 0.9911 | -14.44           | 3.695     | 1.362  | 0.9961 |
| 5     | B97-D3 CP    | 6-31G(d)    | -20.43           | 3.654     | 1.298 | 0.9969 | -17.48           | 3.645     | 1.384  | 0.9991 |
| 6     | PBE0-D2 CP   | 6-31G(d)    | -8.46            | 3.741     | 1.531 | 0.9985 | -5.56            | 3.752     | 1.6986 | 0.9997 |
| 7     | PBE0-D3 CP   | 6-31G(d)    | -15.66           | 3.715     | 1.355 | 0.9988 | -12.59           | 3.716     | 1.4422 | 0.9999 |
| 8     | PBE0-D2 CP   | 6-31+G(d,p) | -7.98            | 3.753     | 1.531 | 0.9988 | -5.03            | 3.774     | 1.695  | 0.9993 |
| 9     | PBE0-D3 CP   | 6-31+G(d,p) | -15.22           | 3.722     | 1.353 | 0.9991 | -12.06           | 3.727     | 1.441  | 0.9998 |
| 10    | PBE0-DCP     | 6-31+G(d,p) | -15.38           | 3.579     | 1.613 | 0.9983 | -13.61           | 3.560     | 1.706  | 0.9962 |
| 11    | B971-DCP3 CP | 6-31G(d)    | -19.67           | 3.638     | 1.428 | 0.9959 | -17.62           | 3.616     | 1.510  | 0.9984 |

**Table S3.** Binding energies, equilibrium distances and fitting parameters for PTCDI and PTCDA dimers with the Lennard-Jones potential function

| PTCDI |              |             |                              |                    |      |         |      |        |                | PTCDA                        |                    |      |         |      |        |                |
|-------|--------------|-------------|------------------------------|--------------------|------|---------|------|--------|----------------|------------------------------|--------------------|------|---------|------|--------|----------------|
| No.   | Method       | Basis set   | D <sub>e</sub><br>(kcal/mol) | R <sub>e</sub> (Å) | a    | b       | c    | d      | R <sup>2</sup> | D <sub>e</sub><br>(kcal/mol) | R <sub>e</sub> (Å) | a    | b       | c    | d      | R <sup>2</sup> |
| 1     | MP2 CP       | 6-31G(d)    | -14.81                       | 3.640              | 3.46 | 9.4740  | 3.83 | 4.6765 | 0.9843         | -12.78                       | 3.620              | 3.44 | 11.1552 | 3.69 | 5.6094 | 0.996          |
| 2     | B3LYP-D2 CP  | 6-31G(d)    | -14.32                       | 3.609              | 3.39 | 10.6652 | 3.70 | 4.7976 | 0.9995         | -11.35                       | 3.603              | 3.38 | 11.3142 | 3.59 | 5.6102 | 0.9978         |
| 3     | B3LYP-D3 CP  | 6-31G(d)    | -18.43                       | 3.600              | 3.49 | 10.6400 | 3.91 | 5.0439 | 0.9979         | -15.36                       | 3.597              | 3.48 | 11.1560 | 3.80 | 5.6977 | 0.9946         |
| 4     | B97-D2 CP    | 6-31G(d)    | -16.72                       | 3.658              | 3.45 | 9.7781  | 3.88 | 4.3074 | 0.9968         | -13.97                       | 3.656              | 3.44 | 10.2651 | 3.76 | 4.8170 | 0.9947         |
| 5     | B97-D3 CP    | 6-31G(d)    | -20.16                       | 3.604              | 3.51 | 10.0527 | 4.01 | 4.7332 | 0.9951         | -17.36                       | 3.599              | 3.50 | 10.5108 | 3.89 | 5.2526 | 0.9916         |
| 6     | PBE0-D2 CP   | 6-31G(d)    | -8.03                        | 3.724              | 3.35 | 11.0708 | 3.44 | 5.2509 | 0.9992         | -5.37                        | 3.723              | 3.33 | 12.1411 | 3.33 | 6.4079 | 0.996          |
| 7     | PBE0-D3 CP   | 6-31G(d)    | -13.97                       | 3.728              | 3.52 | 10.0615 | 3.85 | 4.8204 | 0.9957         | -12.45                       | 3.669              | 3.47 | 10.9241 | 3.72 | 5.4835 | 0.9942         |
| 8     | PBE0-D2 CP   | 6-31+G(d,p) | -7.56                        | 3.738              | 3.35 | 11.0656 | 3.42 | 5.2926 | 0.9985         | -4.84                        | 3.762              | 3.32 | 11.9334 | 3.28 | 6.1292 | 0.9973         |
| 9     | PBE0-D3 CP   | 6-31+G(d,p) | -14.92                       | 3.676              | 3.49 | 10.4036 | 3.83 | 4.9392 | 0.9962         | -11.95                       | 3.680              | 3.47 | 10.9247 | 3.71 | 5.5275 | 0.9927         |
| 10    | PBE0-DCP     | 6-31+G(d,p) | -15.87                       | 3.542              | 3.51 | 11.9785 | 3.79 | 6.7753 | 0.9845         | -14.21                       | 3.523              | 3.47 | 12.7533 | 3.70 | 7.3447 | 0.9847         |
| 11    | B971-DCP3 CP | 6-31G(d)    | -19.53                       | 3.592              | 3.50 | 11.0178 | 3.93 | 5.1558 | 0.9953         | -17.73                       | 3.573              | 3.50 | 11.4255 | 3.86 | 5.7782 | 0.9949         |

**Table S4.** Binding energies, equilibrium distances and fitting parameters for PTCDI and PTCDA dimers with the Buckingham potential function

**PTCDI**

**PTCDA**

| No. | Method       | Basis set   | D <sub>e</sub><br>(kcal/mol) | R <sub>e</sub> (Å) | a         | b      | c       | R <sup>2</sup> | D <sub>e</sub><br>(kcal/mol) | R <sub>e</sub> (Å) | a         | b      | c       | R <sup>2</sup> |
|-----|--------------|-------------|------------------------------|--------------------|-----------|--------|---------|----------------|------------------------------|--------------------|-----------|--------|---------|----------------|
| 1   | MP2 CP       | 6-31G(d)    | -15.38                       | 3.662              | 47429.25  | 3.0007 | 3540.75 | 0.9998         | -12.66                       | 3.654              | 74387.42  | 3.2236 | 2664.27 | 0.9995         |
| 2   | B3LYP-D2 CP  | 6-31G(d)    | -14.69                       | 3.63               | 54125.86  | 3.0879 | 3136.09 | 0.9973         | -11.42                       | 3.622              | 120791.65 | 3.4461 | 2153.39 | 0.9996         |
| 3   | B3LYP-D3 CP  | 6-31G(d)    | -18.49                       | 3.633              | 51784.27  | 2.9912 | 4115.81 | 0.9997         | -15.13                       | 3.630              | 80320.22  | 3.2110 | 3092.80 | 0.9992         |
| 4   | B97-D2 CP    | 6-31G(d)    | -17.32                       | 3.684              | 26293.95  | 2.7352 | 4641.80 | 0.9937         | -14.32                       | 3.680              | 37591.78  | 2.9310 | 3472.54 | 0.9978         |
| 5   | B97-D3 CP    | 6-31G(d)    | -20.36                       | 3.640              | 32516.24  | 2.7868 | 5027.54 | 0.9987         | -17.34                       | 3.632              | 46171.98  | 2.9745 | 3880.35 | 0.9991         |
| 6   | PBE0-D2 CP   | 6-31G(d)    | -8.26                        | 3.734              | 84256.50  | 3.3318 | 1872.95 | 0.9997         | -5.35                        | 3.758              | 217725.71 | 3.7368 | 1142.83 | 0.9987         |
| 7   | PBE0-D3 CP   | 6-31G(d)    | -15.50                       | 3.703              | 38989.31  | 2.8977 | 3932.50 | 0.9998         | -12.38                       | 3.708              | 56413.14  | 3.0932 | 2926.91 | 0.9994         |
| 8   | PBE0-D2 CP   | 6-31+G(d,p) | -7.77                        | 3.748              | 81212.89  | 3.3267 | 1800.10 | 0.9997         | -4.84                        | 3.783              | 200035.41 | 3.7180 | 1070.99 | 0.9982         |
| 9   | PBE0-D3 CP   | 6-31+G(d,p) | -15.06                       | 3.711              | 37906.67  | 2.8918 | 3869.61 | 0.9999         | -11.85                       | 3.720              | 54355.50  | 3.0854 | 2853.96 | 0.9991         |
| 10  | PBE0-DCP     | 6-31+G(d,p) | -15.06                       | 3.566              | 214023.48 | 3.5981 | 2520.77 | 0.9922         | -13.26                       | 3.551              | 380736.67 | 3.8425 | 2059.15 | 0.9878         |
| 11  | B971-DCP3 CP | 6-31G(d)    | -19.49                       | 3.624              | 70750.39  | 3.0878 | 4127.31 | 0.9984         | -17.36                       | 3.604              | 110159.51 | 3.2937 | 3338.37 | 0.9985         |

### Impact of the dispersion correction scheme on the APEFs parameters

As observed in Figures 1 and 2, the PBE0-D results are mostly affected by the adopted dispersion correction scheme. Thus, the PBE0-D3 binding energies are about 6.9 kcal/mol larger in magnitude, while  $R_e$  values are around 0.05 Å shorter than for PBE0-D2. Expectedly, the quality of the used basis sets does not affect considerably the PECs' parameters calculated by using these PBE0-D approaches. Since dispersion correction schemes are independent on the used basis sets, these small variations between the two employed BSs are due to the minor differences between the optimized geometrical parameters at the corresponding level of theory and the differences between the used damping functions.

Considering the deviations from the MP2 (and PBE0-DCP) calculated binding energies, it is clear that D3 correction is imperative when PBE0 functional (with both BSs) is used as a DFT-D type approach while its predecessor D2 seems to be sufficient when it is coupled to B3LYP and B97 functionals.

As seen in Table 1, even though not corrected for BSSE, PBE0-DCP approach predicts a binding energy of -15.61 kcal/mol (MS fitted curve) for PTCDI in excellent agreement with either the more laborious CP corrected MP2 method, with B3LYP-D2, B97-D2 and PBE0-D3 approaches or with previously reported data<sup>54</sup>. The same approach performs also very well for PTCDA, providing binding energies in good agreement with MP2 method. For both derivatives, the intermonomer equilibrium distance given by the PBE0-DCP approach is significantly lower than the CP corrected values predicted by MP2 and DFT-D methods. Actually, for all the computational methods, the not-CP corrected  $R_e$  values, either for PTCDI or PTCDA are closer to the experimental interplanar spacing for planar perylene structures of about 3.5 Å.<sup>137</sup>

Similar analytical PECs have been derived by Lilienfeld and Andrienko<sup>86</sup> for a series of  $\pi$ - $\pi$  stacked dimers of polyaromatic hydrocarbons. These authors used a DFT-DCP-type approach coupled with a plane-wave basis set, with dispersion calibrated atom centered potentials on C atoms only. For the pyrene dimer they obtained  $D_e$  and  $R_e$  values of -0.687 eV and 3.630 Å, respectively, by fitting the calculated curves to LJ, Morse and Buckingham potentials. Our results obtained by fitting the PBE0-DCP data with the Buckingham potential are similar: -0.653 eV and 3.566 Å for PTCDI and -0.575 eV and 3.551 Å for PTCDA. Moreover, as seen in Table S4, our Buckingham parameters for the two derivatives, obtained by fitting the PBE0-DCP data ( $A=2.14 \cdot 10^5$ ,  $B=3.598$  and  $C=2.52 \cdot 10^3$  for PTCDI;  $A=3.81 \cdot 10^5$ ,  $B=3.843$  and  $C=2.06 \cdot 10^3$  for PTCDA) are also in line with those obtained for perylene.<sup>86</sup>  $A=2.09 \cdot 10^5$ ,  $B=3.388$  and  $C=4.47 \cdot 10^4$ . Thus, PBE0-DCP is again validated as a reliable and fast approach for calculating

coarse-grained interaction potentials that can be subsequently fitted to an APEF.

Gross and collaborators<sup>96</sup> have obtained the APEF for the interaction between the pentacene and CO molecules by fitting the PBE-vdW calculated interaction energies (in the attractive part of the potential) with a Lennard-Jones potential of general form. Their exponents (b and d) are very close to the standard 12-6 LJ potential. Our exponents, obtained by fitting all the calculated points are between 9.15 and 12.76 and between 4.30 and 7.06, respectively (see Table S3) for both PTCs. Such deviations from the exact “12-6” values are normally expected, depending on the shape and size of the interacting entities<sup>59,123</sup> and on the effects of the electrostatic contributions.

### Dispersion energies for PTCDI and PTCDA

As shown in Figures 1 and 2, different DFT-D approaches provide quantitatively different binding energies. In order to investigate further this effect we present in Fig.S7 the dispersion energies as a function of the inter-monomer distance for the two kind of analyzed dimers, calculated using the B3LYP-D3, B97-D3 and PBE0-D3 methods with the BS1 basis set.

These energies have been obtained by subtracting twice the intramolecular dispersion energy calculated at the same level of theory from the total dispersion energy of the dimer.

As observed in Fig. S7, for an inter-monomer distance of 3 Å, B97-D3 method provides significantly more (attractive) dispersion interactions than the other two used methods while the three approaches converge at large inter-monomer separation (6.0 Å). Thus, for PTCDI they are -3.23, -3.11 and -2.81 kcal/mol for B97-D3/BS1, B3LYP-D3/BS1 and PBE0-D3/BS1, respectively, while for PTCDA the corresponding values are: -3.09, -3.00 and -2.70 kcal/mol.

By fitting the dependencies of the dispersion energies calculated with the three functionals for both dimers, we estimated the dispersion energies at the corresponding minimum of the potential: -39.57, -34.38 and -24.03 kcal/mol for PTCDI and -37.52, -32.77 and -22.14 kcal/mol for PTCDA. Thus, the ratios of these energies and the corresponding binding energies (see Tables 1 and 2) are between 1.56 (for PTCDI with PBE0-D) method and 2.18 (for PTCDA with B97-D method).

Very similar contributions of the dispersion energies to binding, calculated by SAPT(DFT) method have been reported for different sheet graphite models.<sup>123,137</sup> Moreover, the ratios of the binding energies of PTCDI and PTCDA and the ratios of the corresponding dispersion energies are also very similar. Thus, the former ratios are: 1.05, 1.06 and 1.09 for B97, B3LYP and PBE0 functionals, while for the second ratio the corresponding values are: 1.16, 1.21 and 1.23. Clearly,

the order of the dispersion energies is mirrored in the total interaction energies and it can also be concluded that H structures of the two dimers are predominantly bound by dispersion interactions.

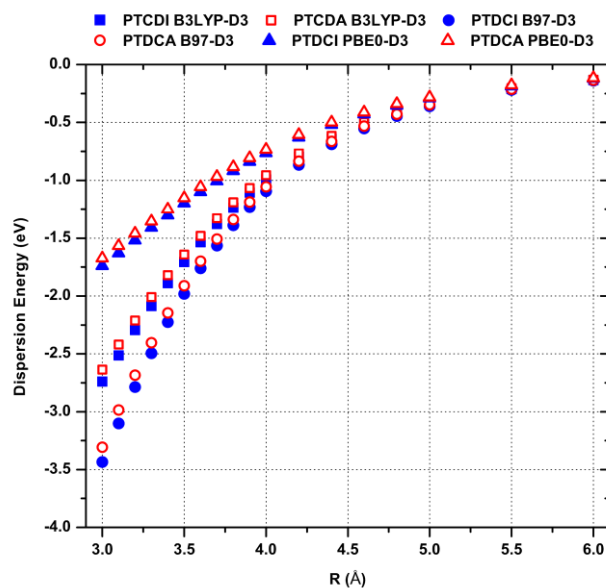

**Fig.S7** Dispersion energies for PTCDI and PTCDA dimers calculated as a function of inter-monomer distance at B3LYP-D3/6-31G(d), B97-D3/6-31G(d) and PBE0-D3/6-31G(d) levels of theory
